# Supplementary material
Source: Springer Nature journal article supplement (https://www.springermedizin.de/resource/supplementary/13256_2011_2229_MOESM6_ESM.pdf/9649276)
Supplement: MOESM6 [file 9649276]

Surgery:  
Gross Total Resection  
(Initial Treatment of Choice)

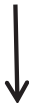

Consider Radiation with Concurrent  
Chemotherapy:

- 60 Gray in 30 fractions
- Temozolomide, 75 mg/m<sup>2</sup> daily
- Bevacizumab, 10 mg/kg every 2 weeks

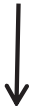

Consider Maintenance Chemotherapy:

- Temozolomide, 75 mg/m<sup>2</sup> daily
- Bevacizumab, 10 mg/kg every 2 weeks
